# Supplementary material for: Sustainable Food Supply by Peri-Urban Diversified Farms of the Agri-Food Region of Central Córdoba, Argentina
Source: MDPI journal article supplement (doi:10.3390/land12010101), 2022-12-28
Supplement: s1 [file s1]

# Supplementary Material

**Table S1:** Common and scientific names of the species mentioned in this work.

| Common name                       | Scientific name                                |
|-----------------------------------|------------------------------------------------|
| lettuce                           | <i>Lactuca sativa</i> L.                       |
| chard                             | <i>Beta vulgaris</i> L. var. <i>cicla</i>      |
| red beet                          | <i>Beta vulgaris</i> L. var. <i>esculenta</i>  |
| cabbage                           | <i>Brassica oleracea</i> var. <i>capitata</i>  |
| spinach                           | <i>Spinaca oleracea</i> L.                     |
| arugula                           | <i>Eruca vesicaria</i> ssp. <i>sativa</i>      |
| chicory                           | <i>Cichorium intybus</i>                       |
| leek                              | <i>Allium ampeloprasum</i> var. <i>porrum</i>  |
| summer squash var. zapallito      | <i>Cucurbita maxima</i> var. <i>zapallito</i>  |
| eggplant                          | <i>Solanum melongena</i> L.                    |
| green onion                       | <i>Allium cepa</i> L.                          |
| broccoli                          | <i>Brassica oleracea</i> var. <i>italica</i>   |
| parsley                           | <i>Petroselinum crispum</i> (Mill.) Nym.       |
| french bean                       | <i>Phaseolus vulgaris</i> L.                   |
| zucchini                          | <i>Cucurbita pepo</i> L.                       |
| autumn squash                     | <i>Cucurbita moschata</i>                      |
| radish                            | <i>Raphanus sativus</i>                        |
| carrot                            | <i>Daucus carota</i> L.                        |
| Broad bean                        | <i>Vicia faba</i> L.                           |
| sweet corn                        | <i>Zea mays</i> var. <i>saccharata</i>         |
| sweet potato                      | <i>Ipomea batatas</i> L.                       |
| cucumber                          | <i>Cucumis sativus</i> L.                      |
| turnip                            | <i>Brassica rapa</i>                           |
| cauliflower                       | <i>Brassica oleracea</i> var. <i>botrytis</i>  |
| artichoke                         | <i>Cynara cardunculus</i> var. <i>scolymus</i> |
| celery                            | <i>Apium graveolens</i> L.                     |
| bell pepper                       | <i>Capsicum annuum</i> L.                      |
| chili / chili pepper / hot pepper | <i>Capsicum frutescens</i> L.                  |
| basil                             | <i>Ocimum basilicum</i> L.                     |
| garlic                            | <i>Allium sativum</i> L.                       |

**Table S2:** Varieties identified in 16 sampled species.

| Species                      | Variety                                                                 |
|------------------------------|-------------------------------------------------------------------------|
| lettuce                      | Criolla, Lechuguín verde, Lechuguín morado, Repollada, Mantecosa        |
| chard                        | Penca blanca, D'Ampuis, Semilla propia                                  |
| beet                         | Lorens                                                                  |
| cabbage                      | Blanco y Morado                                                         |
| spinach                      | Risuan holanda, Var. Tokita japon, de Verano                            |
| chicory                      | Fina de corte, Pan de azúcar, Spadona                                   |
| leek                         | Azul de Italia, Carentan                                                |
| summer squash var. zapallito | Angelo, Franco                                                          |
| eggplant                     | Alargada, Redonda, Verbal, Morocha                                      |
| broccoli                     | Imperial, Tentación ATX                                                 |
| French bean                  | Rolliza, Enana, Indeterminada, Blanca determinada INTA, Enana, Stringer |
| autumn squash                | Cokena                                                                  |
| Sweet corn                   | Opaco blanco, Amarillo dulce                                            |
| Sweet potato                 | INTA                                                                    |
| artichoke                    | Morado, Verde, Ópera, Violeta chato                                     |
| Bell pepper                  | Fiuco, Caimán                                                           |

**Table S3:** Productivity (kg/m<sup>2</sup>) per species obtained in the present study (2019) compared with previous local records (Lanfranconi et al., 1987 and Tártara et al., 1998), and records for Argentina, South America and the world (FAOSTAT). “**Productivity per cycle**” is the arithmetic mean of productivity per species fitted to the model of cycle harvest (The species with an adjustment are indicated with an \*).

| Experimental 2019 |                                   |                                             | Lanfranconi 1982                  | Tártara 1998                      | FAOSTAT 2019 _ Productivity (kg/m <sup>2</sup> ) |               |       |                                    |
|-------------------|-----------------------------------|---------------------------------------------|-----------------------------------|-----------------------------------|--------------------------------------------------|---------------|-------|------------------------------------|
| Species           | Productivity (kg/m <sup>2</sup> ) | Productivity per cycle (kg/m <sup>2</sup> ) | Productivity (kg/m <sup>2</sup> ) | Productivity (kg/m <sup>2</sup> ) | Argentina                                        | South America | World | FAOSTAT Reference Name             |
| chard             | 6.25                              | 6.25                                        | 4.76                              | 3.39                              | n/d                                              | n/d           | n/d   |                                    |
| chicory           | 2.26                              | 2.26                                        | 1.97                              | 1.62                              | n/d                                              | 1.59          | 2.21  | Lettuce and chicory                |
| ají picante*      | 0.77                              | 7.65                                        | 0.45                              | n/d                               | 2.42                                             | 1.69          | 1.91  | Chilies and peppers, green         |
| garlic            | 0.31                              | 0.31                                        | 1.02                              | n/d                               | 0.94                                             | 1.02          | 1.88  | Garlic                             |
| artichoke         | 3.41                              | 3.41                                        | 1.15                              | n/d                               | 2.87                                             | 2.06          | 1.30  | Artichokes                         |
| celery            | 1.64                              | 1.64                                        | 3.45                              | 2.40                              | 1.54                                             | 1.38          | 1.42  | Vegetables, fresh nes              |
| sweet potato      | 4.9                               | 4.9                                         | 1.51                              | n/d                               | 1.49                                             | 1.39          | 1.18  | Sweet potatoes                     |
| eggplant*         | 3.89                              | 15.55                                       | 1.90                              | n/d                               | n/d                                              | 2.14          | 2.99  | Eggplants (aubergines)             |
| broccoli          | 3.33                              | 3.33                                        | 2.62                              | n/d                               | n/d                                              | 1.10          | 1.87  | Cabbages and other brassicas       |
| autumn squash*    | 4.03                              | 16.1                                        | 5.30                              | n/d                               | 1.40                                             | 1.60          | 1.49  | Pumpkins, squash and gourds        |
| green onion       | 3.2                               | 3.2                                         | 1.81                              | 1.83                              | n/d                                              | 1.03          | 2.04  | Leeks, other alliaceous vegetables |
| frenc bean*       | 1.23                              | 12.26                                       | 1.79                              | 1.33                              | 0.75                                             | 0.50          | 0.95  | Beans, green                       |
| maize             | 3.06                              | 3.06                                        | 0.62                              | n/d                               | n/d                                              | 0.93          | 0.82  | Maize, green                       |
| cauliflower       | 5.14                              | 5.14                                        | 3.60                              | n/d                               | n/d                                              | 1.10          | 1.87  | Cabbages and other brassicas       |
| spinach           | 2.65                              | 2.65                                        | 2.35                              | n/d                               | n/d                                              | 1.70          | 3.23  | Spinach                            |
| broad bean*       | 2.99                              | 11.95                                       | 2.23                              | n/d                               | 0.89                                             | 0.11          | 0.21  | Broad beans, horse beans, dry      |
| lettuce           | 3.64                              | 3.64                                        | 1.80                              | 1.46                              | n/d                                              | 1.59          | 2.21  | Lettuce and chicory                |
| turnip            | 6.03                              | 6.03                                        | 1.50                              | n/d                               | 3.16                                             | 2.42          | 3.97  | Carrots and turnips                |
| cucumber*         | 4.05                              | 40.47                                       | 1.18                              | n/d                               | n/d                                              | 1.62          | 3.93  | Cucumbers and gherkins             |
| parsley           | 2.08                              | 2.08                                        | 2.62                              | 2.46                              | 1.54                                             | 1.38          | 1.42  | Vegetables, fresh nes              |
| bell pepper*      | 1.23                              | 12.25                                       | 1.50                              | n/d                               | 2.42                                             | 1.69          | 1.91  | Chilies and peppers, green         |
| leek              | 3.16                              | 3.16                                        | 2.06                              | 2.21                              | n/d                                              | 1.96          | 1.61  | Leeks, other alliaceous vegetables |
| small radish*     | 2.09                              | 4.18                                        | 0.60                              | 0.67                              | 1.54                                             | 1.38          | 1.42  | Vegetables, fresh nes              |
| beet*             | 6.25                              | 12.5                                        | 1.67                              | 1.49                              | 1.54                                             | 1.38          | 1.42  | Vegetables, fresh nes              |

|                 |      |       |      |      |      |      |      |                                        |
|-----------------|------|-------|------|------|------|------|------|----------------------------------------|
| cabbage         | 9.15 | 9.15  | 4.80 | 3.52 | n/d  | 2.05 | 2.87 | Cabbages and other cruciferous species |
| arugula         | 1.77 | 1.77  | n/d  | n/d  | n/d  | 1.59 | 2.21 | Lettuce and chicory                    |
| carrot*         | 7.32 | 14.65 | 1.84 | 1.74 | 3.16 | 2.42 | 3.97 | Carrots and turnips                    |
| summer squash   |      |       |      |      |      |      |      |                                        |
| var. zapallito* | 2.71 | 27.13 | 1.17 | 1.21 | n/d  | n/d  | n/d  |                                        |
| zucchini*       | 4.27 | 42.68 | n/d  | n/d  | n/d  | n/d  | n/d  |                                        |
| basil           | 0.89 | 0.89  | n/d  | n/d  | n/d  | n/d  | n/d  |                                        |

n/d: No data

**Table S4:** Programs and initiatives for commercialization in Argentina

|                                                                   |                                                                                                                                                                                                                                                                                                                                                                                                                                                                                                                                                                                                                                                                                                                                                                                                                                                                                                                                                                                                                                                                                                                                                                                                                                                                                                                                                                                                                                                                                |
|-------------------------------------------------------------------|--------------------------------------------------------------------------------------------------------------------------------------------------------------------------------------------------------------------------------------------------------------------------------------------------------------------------------------------------------------------------------------------------------------------------------------------------------------------------------------------------------------------------------------------------------------------------------------------------------------------------------------------------------------------------------------------------------------------------------------------------------------------------------------------------------------------------------------------------------------------------------------------------------------------------------------------------------------------------------------------------------------------------------------------------------------------------------------------------------------------------------------------------------------------------------------------------------------------------------------------------------------------------------------------------------------------------------------------------------------------------------------------------------------------------------------------------------------------------------|
| Programs and initiatives for commercialization                    |                                                                                                                                                                                                                                                                                                                                                                                                                                                                                                                                                                                                                                                                                                                                                                                                                                                                                                                                                                                                                                                                                                                                                                                                                                                                                                                                                                                                                                                                                |
| Producers' organizations for direct commercialization             | <p>MTE <i>Pueblo a Pueblo</i>:<br/> <a href="https://puebloapueblocba.mitiendanube.com/bolsa/">https://puebloapueblocba.mitiendanube.com/bolsa/</a><br/>           UTT Almacén:<br/> <a href="https://www.almacenutt.com.ar/faq.php">https://www.almacenutt.com.ar/faq.php</a><br/>           Red de Ferias Agroecológicas:<br/> <a href="https://www.voydeferia.com/">https://www.voydeferia.com/</a><br/>           Ferrer, G., Saal, G. A., Barrientos, M. A., &amp; Francavilla, G. (2020). Circuitos cortos de comercialización de la agricultura urbana y periurbana en la zona central de Córdoba, Argentina. <i>Otra Economía</i>, 13(23), 145-160.</p>                                                                                                                                                                                                                                                                                                                                                                                                                                                                                                                                                                                                                                                                                                                                                                                                                |
| Programs and incentives to local markets                          | <p><i>Mercado Saludable Rosario</i>:<br/> <a href="https://www.mercadosaludable.com.ar/">https://www.mercadosaludable.com.ar/</a><br/>           Buenos Aires, <i>de la tierra a tu mesa</i>:<br/> <a href="https://www.buenosaires.gob.ar/coronavirus/bienestar/de-la-tierra-tu-mesa">https://www.buenosaires.gob.ar/coronavirus/bienestar/de-la-tierra-tu-mesa</a><br/>           INTA estímulo comercialización de bolsones de verduras:<br/> <a href="https://inta.gob.ar/noticias/el-inta-facilita-la-venta-de-bolsones-con-frutas-y-verduras-a-precio-justo-junto-a-productores-e-instituciones-estatales-en-el-valle-de-uco">https://inta.gob.ar/noticias/el-inta-facilita-la-venta-de-bolsones-con-frutas-y-verduras-a-precio-justo-junto-a-productores-e-instituciones-estatales-en-el-valle-de-uco</a><br/> <a href="https://inta.gob.ar/noticias/comercializan-verdura-agroecologica-en-cruz-del-eje-con-asesoramiento-del-inta-y-el-inti">https://inta.gob.ar/noticias/comercializan-verdura-agroecologica-en-cruz-del-eje-con-asesoramiento-del-inta-y-el-inti</a><br/>           Iniciativas sindicales de acceso a diversidad de alimentos frescos de proximidad:<br/> <a href="https://atecordoba.org/?p=20514">https://atecordoba.org/?p=20514</a><br/> <a href="https://adiuc.org.ar/2021/08/12/compra-alimentos-de-calidad-adiuc-te-los-lleva-a-tu-casa/">https://adiuc.org.ar/2021/08/12/compra-alimentos-de-calidad-adiuc-te-los-lleva-a-tu-casa/</a></p> |
| Policies for the diversification of consumption and/or production |                                                                                                                                                                                                                                                                                                                                                                                                                                                                                                                                                                                                                                                                                                                                                                                                                                                                                                                                                                                                                                                                                                                                                                                                                                                                                                                                                                                                                                                                                |
| Argentina                                                         | <p>Programa Agricultura Urbana Rosario:<br/> <a href="https://www.rosario.gob.ar/web/ciudad/economia-social/agricultura-urbana">https://www.rosario.gob.ar/web/ciudad/economia-social/agricultura-urbana</a><br/>           Argentina contra el hambre -canales de comercialización:<br/> <a href="https://www.argentina.gob.ar/argentina-contra-el-hambre/canales-de-comercializacion-para-la-economia-social">https://www.argentina.gob.ar/argentina-contra-el-hambre/canales-de-comercializacion-para-la-economia-social</a></p>                                                                                                                                                                                                                                                                                                                                                                                                                                                                                                                                                                                                                                                                                                                                                                                                                                                                                                                                            |
| Global                                                            | <p>Sustainable Development Goals: 2, Zero Hunger<br/> <a href="https://www.un.org/sustainabledevelopment/es/hunger/">https://www.un.org/sustainabledevelopment/es/hunger/</a><br/>           Balasha, A. M., &amp; Nsele, M. K. (2019). <i>Revue Africaine d'Environnement et d'Agriculture</i>.</p>                                                                                                                                                                                                                                                                                                                                                                                                                                                                                                                                                                                                                                                                                                                                                                                                                                                                                                                                                                                                                                                                                                                                                                           |

|  |                                                                                                                                                                                                                                                                |
|--|----------------------------------------------------------------------------------------------------------------------------------------------------------------------------------------------------------------------------------------------------------------|
|  | <p>Revue Africaine d'Environnement et d'Agriculture, 2(1), 11-19.</p> <p>Ortale, M. S. (2020). ¿Hambre Cero? . Ciencia, tecnología Y política, 3(5), 043.</p> <p><a href="https://doi.org/10.24215/26183188e043">https://doi.org/10.24215/26183188e043</a></p> |
|--|----------------------------------------------------------------------------------------------------------------------------------------------------------------------------------------------------------------------------------------------------------------|
